# Supplementary material for: Bromodomain inhibition of the transcriptional coactivators CBP/EP300 as a therapeutic strategy to target the IRF4 network in multiple myeloma
Source: eLife journal article supplement (doi:10.7554/elife.10483), 2016-01-05

A

| Cell line | type    | GI50, $\mu$ M |          |
|-----------|---------|---------------|----------|
|           |         | SGC-CBP30     | I-CBP112 |
| LP-1      | myeloma | 0.78          | 1.51     |
| KMS20     | myeloma | 1.05          | 2.97     |
| KMS21BM   | myeloma | 1.27          | 3.26     |
| KMS12BM   | myeloma | 1.30          | 2.36     |
| KMS34     | myeloma | 1.30          | 2.53     |
| KMS26     | myeloma | 1.34          | 2.30     |
| OPM2      | myeloma | 1.53          | 2.82     |
| NCI-H929  | myeloma | 1.68          | 3.80     |
| AMO-1     | myeloma | 1.80          | 9.39     |
| Kasumi-1  | AML     | 1.95          | 3.22     |
| MOLP-8    | myeloma | 2.06          | 3.52     |
| KMS28BM   | myeloma | 2.17          | 4.44     |
| KMS-11    | myeloma | 2.41          | 16.27    |
| JJN3      | myeloma | 2.53          | 11.17    |
| U266      | myeloma | 2.63          | 7.61     |
| SEM       | ALL     | 2.83          | 5.34     |
| THP-1     | AML     | 2.85          | 5.35     |
| MV411     | AML     | 3.33          | 13.09    |
| RPMI-8226 | myeloma | 3.44          | 14.61    |
| OCI-AML-3 | AML     | 3.49          | 5.51     |
| OCI-AML-2 | AML     | 3.68          | 9.70     |
| Kasumi-2  | AML     | 3.77          | 8.12     |
| Nalm6     | ALL     | 3.86          | ND       |
| EJM       | myeloma | 3.87          | 14.64    |
| NB4       | APL     | 3.93          | 17.82    |
| HL60      | APL     | 4.01          | 4.55     |
| SET2      | AML     | 4.47          | 12.55    |
| SKNO-1    | AML     | 4.80          | 9.50     |
| KMS12PE   | myeloma | 5.34          | 12.77    |
| SKM-1     | AML     | 6.61          | 15.87    |
| ML2       | AML     | 6.65          | 20.00    |
| MOLM-13   | AML     | 6.93          | 15.71    |
| KOPN-8    | ALL     | 7.23          | 18.49    |
| SD-1      | ALL     | 7.28          | 13.47    |
| NOMO-1    | AML     | 7.40          | 8.70     |
| VAL       | ALL     | 7.54          | 14.17    |
| MOLT4     | ALL     | 7.62          | 20.00    |
| Molt-16   | ALL     | 7.98          | 17.59    |
| K562      | CML     | 8.86          | 20.00    |
| Tanoue    | ALL     | 8.88          | 20.00    |
| RS4;11    | ALL     | 9.99          | 15.60    |
| KMM-1     | myeloma | 11.66         | 20.00    |
| KMS27     | myeloma | 11.75         | 20.00    |
| Jurkat    | ALL     | 11.97         | 20.00    |
| MN-60     | ALL     | 12.34         | 20.00    |
| 380       | ALL     | 15.55         | 20.00    |
| ROS 50    | ALL     | 16.41         | 20.00    |
| PL21      | APL     | 17.04         | 20.00    |
| KMS28PE   | myeloma | 17.89         | 20.00    |
| REH       | ALL     | 18.51         | 20.00    |
| OCI-AML-5 | AML     | 20.00         | 20.00    |

B

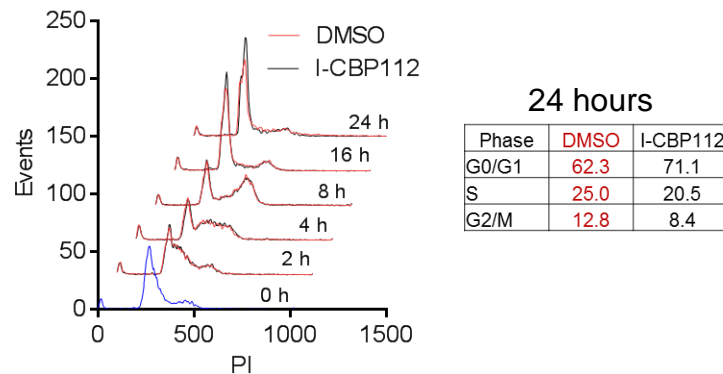

C

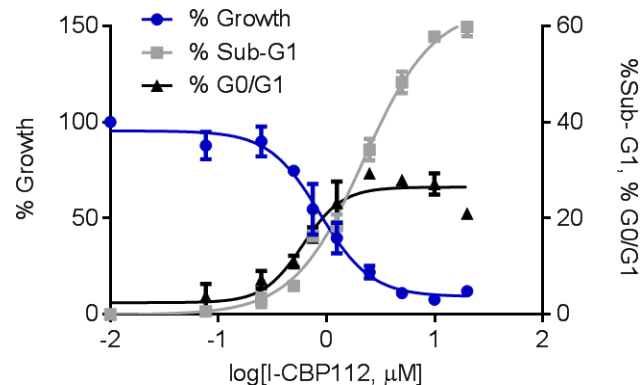

Supplement: supp [file elife_poa_e10483_Figure_2_figure_supplement_1.pdf › elife_poa_e10483_Figure_2_figure_supplement_1.pdf]
