# Supplementary material for: Bromodomain inhibition of the transcriptional coactivators CBP/EP300 as a therapeutic strategy to target the IRF4 network in multiple myeloma
Source: eLife journal article supplement (doi:10.7554/elife.10483), 2016-01-05
Supplement: supp [file elife_poa_e10483_Figure_1_figure_supplement_1.pdf › elife_poa_e10483_Figure_1_figure_supplement_1.pdf]

| Protein      | $\Delta T_m$ ,<br>SGC-CBP30 | SEM  | $\Delta T_m$ ,<br>I-CBP112 | SEM  |
|--------------|-----------------------------|------|----------------------------|------|
| ASH1L        | 0.04                        | 0.00 | 0.04                       | 0.00 |
| BAZ1A        | 0.18                        | 0.12 | 0.41                       | 0.00 |
| BAZ2B        | -0.06                       | 0.12 | 0.28                       | 0.31 |
| BPTF         | 0.69                        | 0.00 | 0.93                       | 0.12 |
| BRD1         | 0.26                        | 0.20 | -0.44                      | 0.12 |
| BRD4         | 2.01                        | 0.00 | 2.12                       | 0.12 |
| BRD7         | 0.50                        | 0.17 | 0.44                       | 0.23 |
| BRD8         | 0.76                        | 0.12 | 0.88                       | 0.12 |
| BRD9         | 0.37                        | 0.12 | 0.37                       | 0.12 |
| BRG1         | 0.27                        | 0.23 | 0.38                       | 0.20 |
| BRPF1        | 0.11                        | 0.00 | 0.11                       | 0.00 |
| BRPF3        | -0.18                       | 0.20 | 0.75                       | 0.31 |
| CBP          | 7.42                        | 0.12 | 4.52                       | 0.00 |
| CECR2        | 0.76                        | 0.20 | 1.46                       | 0.40 |
| GCN5         | -0.09                       | 0.00 | 0.14                       | 0.12 |
| PCAF         | -0.08                       | 0.31 | -0.08                      | 0.51 |
| TAF1 BD1 BD2 | 0.12                        | 0.00 | 0.12                       | 0.00 |
| TRIM24       | 0.43                        | 0.00 | 0.32                       | 0.12 |
| WDR9         | -0.08                       | 0.00 | 0.04                       | 0.12 |
