# Supplementary material for: Bromodomain inhibition of the transcriptional coactivators CBP/EP300 as a therapeutic strategy to target the IRF4 network in multiple myeloma
Source: eLife journal article supplement (doi:10.7554/elife.10483), 2016-01-05
Supplement: supp [file elife_poa_e10483_Figure_2_figure_supplement_2.pdf › elife_poa_e10483_Figure_2_figure_supplement_2.pdf]

| Cell line | type    | SGC-CBP30     |      | I-CBP112      |       |
|-----------|---------|---------------|------|---------------|-------|
|           |         | GI50, $\mu$ M | SD   | GI50, $\mu$ M | SD    |
| LP-1      | myeloma | 0.78          | 0.17 | 1.51          | 0.43  |
| KMS20     | myeloma | 1.05          | 0.35 | 2.97          | 1.01  |
| KMS21BM   | myeloma | 1.27          | 0.84 | 3.26          | 2.07  |
| KMS12BM   | myeloma | 1.30          | 0.35 | 2.36          | 1.63  |
| KMS34     | myeloma | 1.30          | 0.30 | 2.53          | 0.27  |
| KMS26     | myeloma | 1.34          | 0.22 | 2.30          | 0.72  |
| OPM2      | myeloma | 1.53          | 0.27 | 2.82          | 2.40  |
| NCI-H929  | myeloma | 1.68          | 0.76 | 3.80          | 3.52  |
| AMO-1     | myeloma | 1.80          | 0.04 | 9.39          | 0.11  |
| Kasumi-1  | AML     | 1.95          | 0.14 | 3.22          | 0.02  |
| MOLP-8    | myeloma | 2.06          | 0.30 | 3.52          | 2.37  |
| KMS28BM   | myeloma | 2.17          | 0.38 | 4.44          | 4.16  |
| KMS-11    | myeloma | 2.41          | 0.32 | 16.27         | 7.76  |
| JJN3      | myeloma | 2.53          | 0.47 | 11.17         | 4.30  |
| U266      | myeloma | 2.63          | 1.09 | 7.61          | 8.82  |
| SEM       | ALL     | 2.83          | 0.24 | 5.34          | 3.42  |
| THP-1     | AML     | 2.85          | 0.34 | 5.35          | 1.55  |
| MV411     | AML     | 3.33          | 0.33 | 13.09         | 5.51  |
| RPMI-8226 | myeloma | 3.44          | 0.28 | 14.61         | 7.62  |
| OCI-AML-3 | AML     | 3.49          | 1.50 | 5.51          | 0.38  |
| OCI-AML-2 | AML     | 3.68          | 1.38 | 9.70          | 2.05  |
| Kasumi-2  | AML     | 3.77          | 2.23 | 8.12          | 5.88  |
| Nalm6     | ALL     | 3.86          | 1.94 | ND            | ND    |
| EJM       | myeloma | 3.87          | 0.38 | 14.64         | 4.65  |
| NB4       | APL     | 3.93          | 1.73 | 17.82         | 7.07  |
| HL60      | APL     | 4.01          | 0.42 | 4.55          | 0.77  |
| SET2 D6   | AML     | 4.47          | 1.53 | 12.55         | 0.56  |
| SKNO-1    | AML     | 4.80          | 0.62 | 9.50          | 3.14  |
| KMS12PE   | myeloma | 5.34          | 0.08 | 12.77         | 10.23 |
| SKM-1     | AML     | 6.61          | 0.64 | 15.87         | 5.85  |
| ML2       | AML     | 6.65          | 0.49 | 20.00         | 0.00  |
| MOLM-13   | AML     | 6.93          | 3.01 | 15.71         | 8.59  |
| KOPN-8    | ALL     | 7.23          | 3.06 | 18.49         | 2.13  |
| SD-1      | ALL     | 7.28          | 4.23 | 13.47         | 9.23  |
| NOMO-1    | AML     | 7.40          | 0.91 | 8.70          | 5.92  |
| VAL       | ALL     | 7.54          | 2.36 | 14.17         | 4.28  |
| MOLT4     | ALL     | 7.62          | 0.85 | 20.00         | 0.00  |
| Molt-16   | ALL     | 7.98          | 2.12 | 17.59         | 3.41  |
| K562      | CML     | 8.86          | 3.33 | 20.00         | 0.83  |
| Tanoue    | ALL     | 8.88          | 4.97 | 20.00         | 0.00  |
| RS4;11    | ALL     | 9.99          | 3.15 | 15.60         | 6.22  |
| KMM-1     | myeloma | 11.66         | 2.14 | 20.00         | 0.00  |
| KMS27     | myeloma | 11.75         | 0.42 | 20.00         | 0.00  |
| Jurkat    | ALL     | 11.97         | 0.96 | 20.00         | 0.00  |
| MN-60     | ALL     | 12.34         | 5.32 | 20.00         | 0.00  |
| 380       | ALL     | 15.55         | 6.30 | 20.00         | 0.00  |
| ROS 50    | ALL     | 16.41         | 5.08 | 20.00         | 0.00  |
| PL21      | APL     | 17.04         | 5.13 | 20.00         | 0.00  |
| KMS28PE   | myeloma | 17.89         | 1.57 | 20.00         | 0.00  |
| REH       | ALL     | 18.51         | 2.58 | 20.00         | 0.00  |
| OCI-AML-5 | AML     | 20.00         | 0.00 | 20.00         | 0.00  |
