# Supplementary material for: Bromodomain inhibition of the transcriptional coactivators CBP/EP300 as a therapeutic strategy to target the IRF4 network in multiple myeloma
Source: eLife journal article supplement (doi:10.7554/elife.10483), 2016-01-05
Supplement: supp [file elife_poa_e10483_Figure_5_figure_supplement_2.pdf › elife_poa_e10483_Figure_5_figure_supplement_2.pdf]

|          | fold IRF4 | error | log2FC | fold MYC | error | log2FC | GI50  | log2GI50 |
|----------|-----------|-------|--------|----------|-------|--------|-------|----------|
| AMO1     | 0.39      | 0.10  | -1.36  | 0.46     | 0.09  | -1.13  | 1.80  | 0.85     |
| MOLP8    | 0.41      | 0.09  | -1.29  | 0.64     | 0.06  | -0.64  | 2.06  | 1.04     |
| LP1      | 0.43      | 0.04  | -1.23  | 0.48     | 0.02  | -1.07  | 0.78  | -0.36    |
| OPM2     | 0.51      | 0.06  | -0.98  | 0.61     | 0.07  | -0.71  | 1.53  | 0.61     |
| KMS28BM  | 0.53      | 0.03  | -0.93  | 0.64     | 0.07  | -0.63  | 2.17  | 1.12     |
| H929     | 0.60      | 0.05  | -0.75  | 0.42     | 0.08  | -1.24  | 1.68  | 0.75     |
| RPMI8226 | 0.68      | 0.02  | -0.55  | 0.71     | 0.08  | -0.49  | 3.44  | 1.78     |
| KMM1     | 0.69      | 0.07  | -0.53  | 0.72     | 0.05  | -0.48  | 11.66 | 3.54     |
| RS411    | 0.81      | 0.04  | -0.31  | 0.68     | 0.16  | -0.56  | 9.99  | 3.32     |
