# Supplementary material for: Bromodomain inhibition of the transcriptional coactivators CBP/EP300 as a therapeutic strategy to target the IRF4 network in multiple myeloma
Source: eLife. 2016 Jan 5;5:e10483. doi: 10.7554/eLife.10483 (PMC4775225; doi:10.7554/eLife.10483)
Supplement: Supplementary file 1. — DOI: http://dx.doi.org/10.7554/eLife.10483.018 [file elife-10483-supp1.xlsx]

## Sheet: Sheet1
	Gene	forward	reverse	UPL #
	MYC	tgaattagaatctcgggagtgc	gagtgagaccccatctcagaa	34
	IRF4	gccaagattccaggtgactc	ctggctagcagaggttctacg	55
	C10orf10	gtccctgctcatccattctc	cactctggcgagaggaggt	1
	PFKFB4	ccagatgaagaggacaatcca	tcctcgtaggtcatttcctca	30
	ARL4C	gaatctctgcacccaaatgc	gtcgagagtaggccggtaaa	17
	ZAP70	gctgcacaagttcctggtc	tcatccccatggacacct	52
	KLF2	catctgaaggcgcatctg	cgtgtgctttcggtagtgg	11
	DLL4	ccctggcaatgtacttgtgat	gtggtgggtgcagtagttga	23
	S1PR1	aacttcgccctgcttgag	tccaggctttttgtgtagctt	19
	KIF21B	ctctgatccacgcccaga	tcaatcttctccttcgacagc	50
	IGFBP3	aacgctagtgccgtcagc	cggtcttcctccgactcac	1
	GAPDH	agccacatcgctcagacac	gcccaatacgaccaaatcc	60
