# Supplementary material for: Bromodomain inhibition of the transcriptional coactivators CBP/EP300 as a therapeutic strategy to target the IRF4 network in multiple myeloma
Source: eLife. 2016 Jan 5;5:e10483. doi: 10.7554/eLife.10483 (PMC4775225; doi:10.7554/eLife.10483)
Supplement: Supplementary file 2. — DOI: http://dx.doi.org/10.7554/eLife.10483.019 [file elife-10483-supp2.xlsx]

## Sheet: Sheet1
		Mycoplasma testing; x indicates tested and clean								ICLAC commonly mis-identified?
Cell line	Source	2014-02-01	2014-02-18	2014-04-02	2014-04-02	2014-06-01	2014-07-01	2015-04-01	2015-10-01
380	DSMZ	x					x			no
AMO-1	DSMZ	x		x	x			x	x	no
EJM	DSMZ			x	x	x	x	x	x	no
HL60	ATCC	x		x	x	x				no
JJN3	DSMZ	x						x	x	no
Jurkat	ATCC	x		x	x	x				no
K562	ATCC	x		x						no
Kasumi-1	ATCC	x		x	x	x		x	x	no
Kasumi-2	DSMZ	x								no
KMM-1	HSRRB	x		x				x	x	no
KMS-11	HSRRB	x		x		x		x	x	no
KMS12BM	DSMZ			x	x		x	x	x	no
KMS12PE	DSMZ	x								no
KMS20	JCRB	x		x	x	x		x	x	no
KMS21BM	JCRB	x						x		yes; possible mis-identification at source
KMS26	HSRRB	x		x	x				x	no
KMS27	JCRB	x		x	x				x	no
KMS28BM	JCRB			x	x	x		x	x	no
KMS28PE	HSRRB			x	x		x	x	x	no
KMS34	JCRB		x	x	x				x	no
KOPN-8	ATCC	x		x	x	x	x			no
LP-1	ATCC	x			x	x		x	x	no
ML2	DSMZ	x				x				no
MN-60	DSMZ	x								no
MOLM-13	DSMZ	x		x	x					no
MOLP-8	DSMZ	x		x	x		x	x	x	no
Molt-16	DSMZ	x		x	x					no
MOLT4	ATCC	x								no
MV411	ATCC	x		x	x	x		x	x	no
Nalm6	DSMZ	x				x				no
NB4	DSMZ	x								no
NCI-H929	ATCC	x		x	x	x		x	x	no
NOMO-1	DSMZ	x			x					no
OCI-AML-2	DSMZ	x			x	x				no
OCI-AML-3	DSMZ	x		x	x		x			no
OCI-AML-5	DSMZ	x		x	x	x		x		no
OPM2	ATCC	x		x	x	x		x	x	no
PL21	DSMZ	x			x					no
REH	ATCC	x								no
ROS 50	DSMZ						x			no
RPMI-8226	ATCC	x		x	x			x	x	no
RS4;11	ATCC		x						x	no
SD-1	DSMZ		x		x					no
SEM	DSMZ		x							no
SET2	DSMZ	x		x	x	x			x	no
SKM-1	DSMZ	x			x	x				no
SKNO-1	DSMZ	x		x	x				x	no
Tanoue	DSMZ	x					x			no
THP-1	ATCC	x				x	x			no
U266	ATCC	x		x		x		x	x	no
VAL	DSMZ	x								no
U2OS	ATCC							x	x	no
293	ATCC								x	no
293FT	ATCC							x	x	no
	*HSRRB cell lines are now available from JCRB collection
	Cell panel profiling for Figures 2A and Figure 2-figure supplement 2A were carried out between February and March of 2014.
	Mechanistic studies using multiple myeloma cell lines were carried out in late 2014 and 2015.
	U2OS, 293, and 293FT cells were used in late 2014/2015.
