# Supplementary figures and images for: Bromodomain inhibition of the transcriptional coactivators CBP/EP300 as a therapeutic strategy to target the IRF4 network in multiple myeloma
Source: eLife journal article supplement (doi:10.7554/elife.10483), 2016-01-05

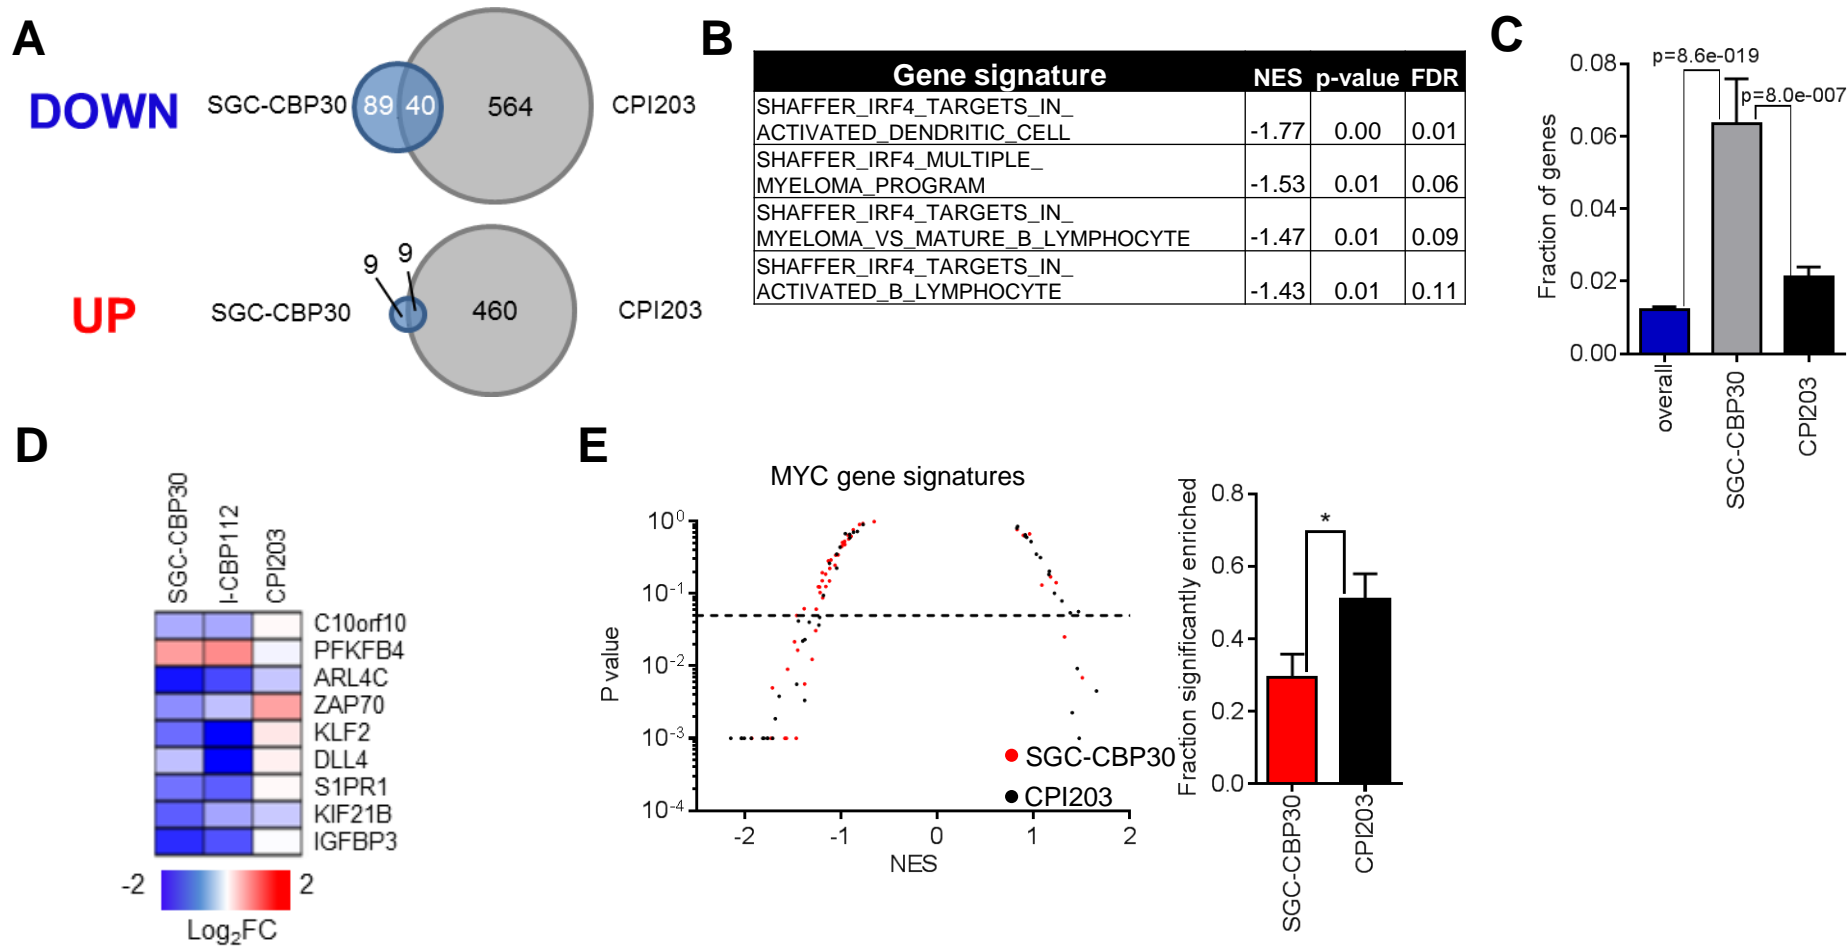

Supplement: supp [file elife_poa_e10483_Figure_3_figure_supplement_1.pdf › elife_poa_e10483_Figure_3_figure_supplement_1.pdf]

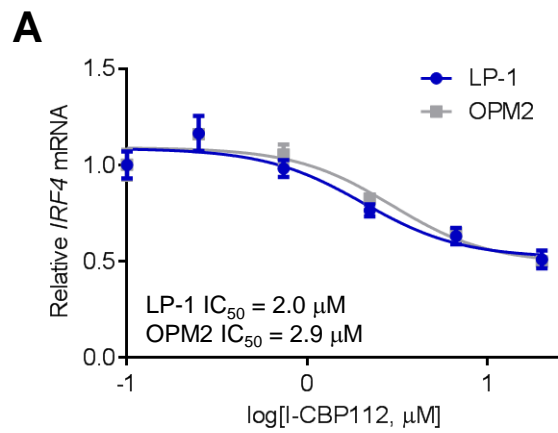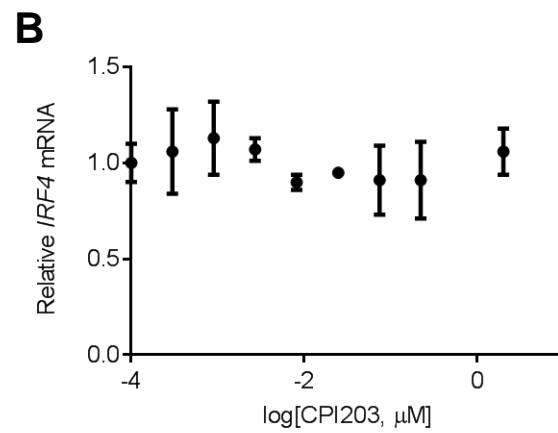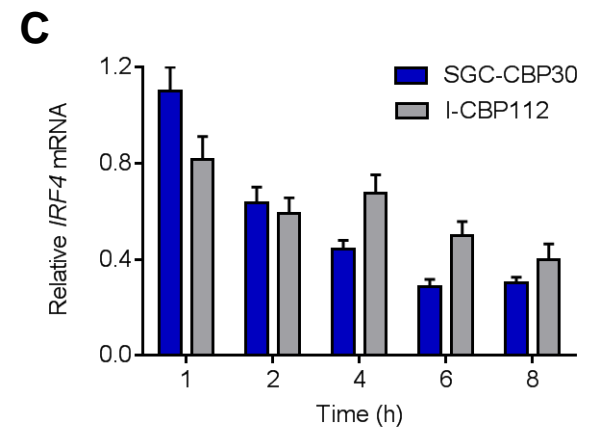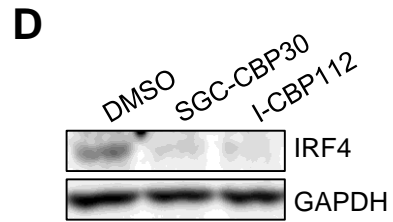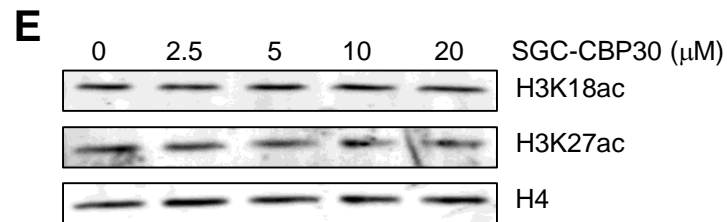

Supplement: supp [file elife_poa_e10483_Figure_4_figure_supplement_1.pdf › elife_poa_e10483_Figure_4_figure_supplement_1.pdf]

**A**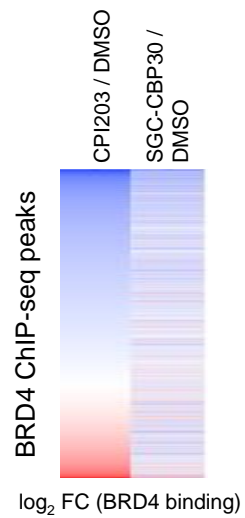**B**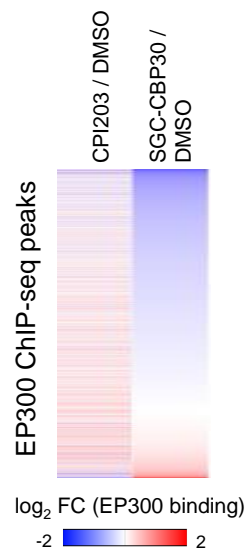**C**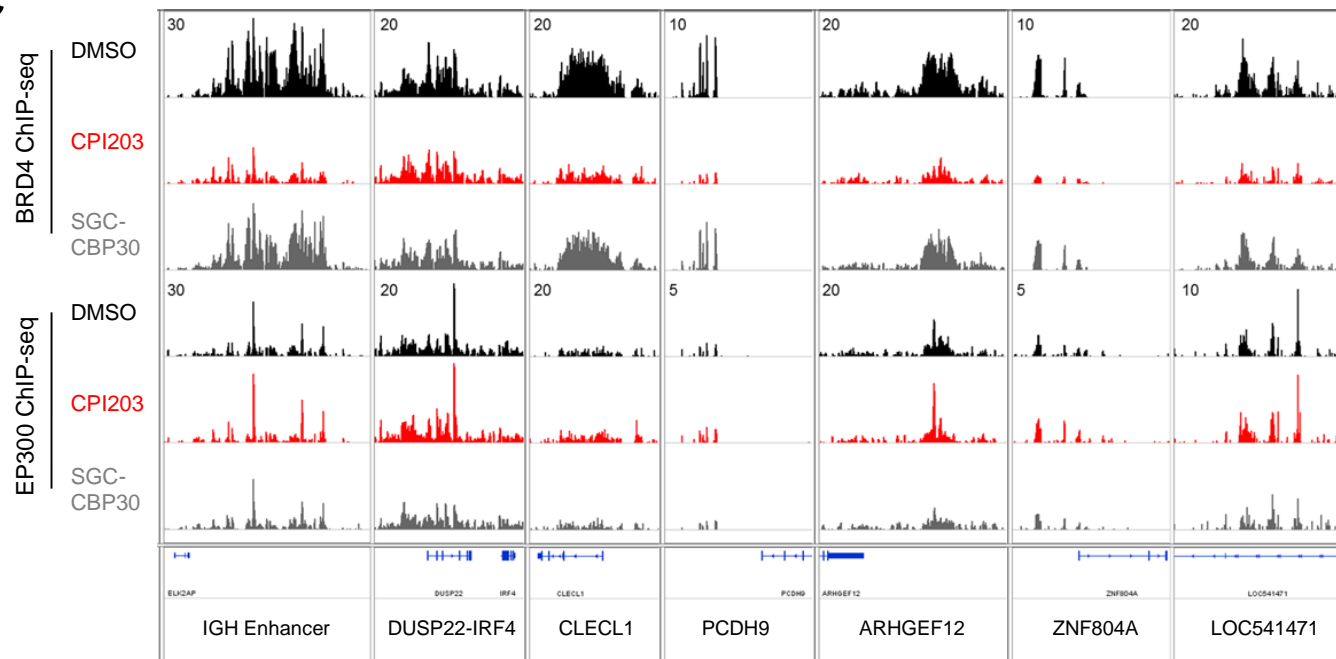

Supplement: supp [file elife_poa_e10483_Figure_4_figure_supplement_2.pdf › elife_poa_e10483_Figure_4_figure_supplement_2.pdf]

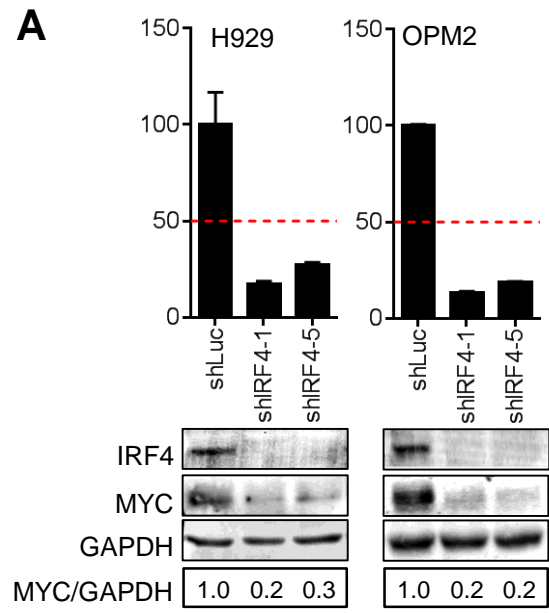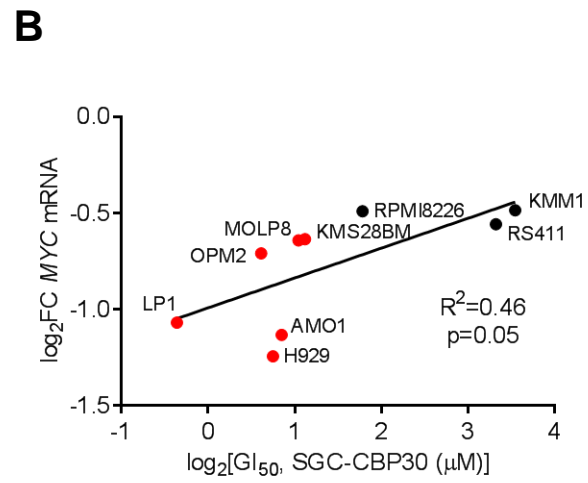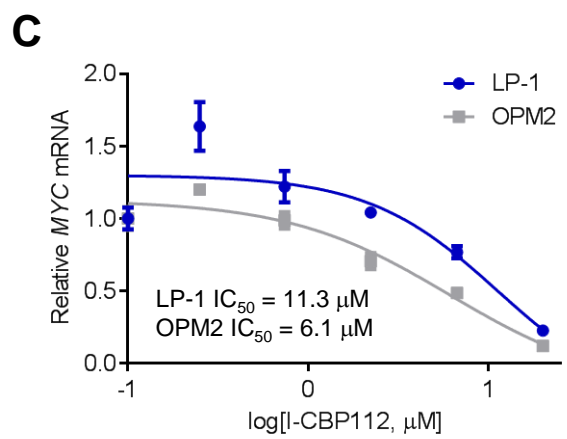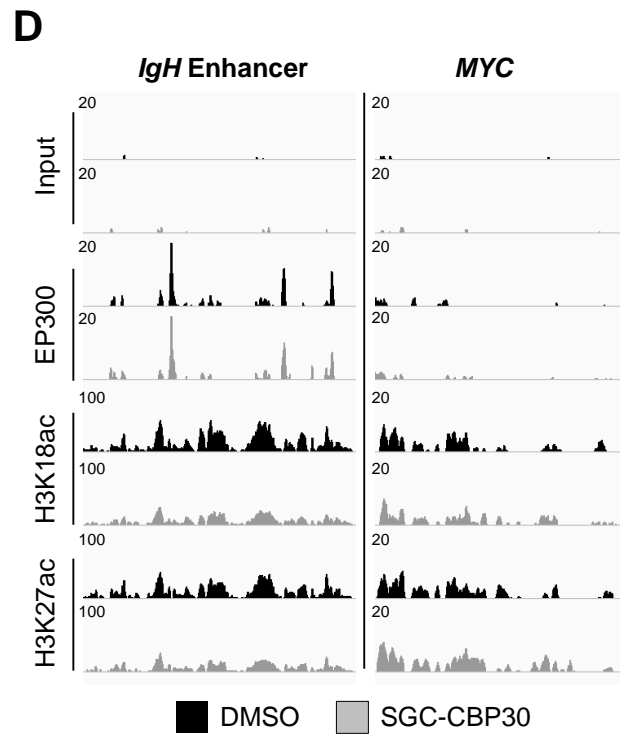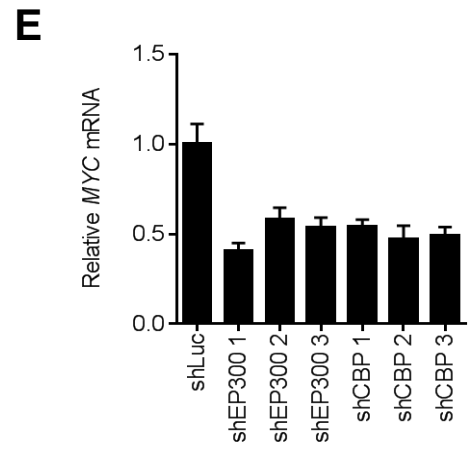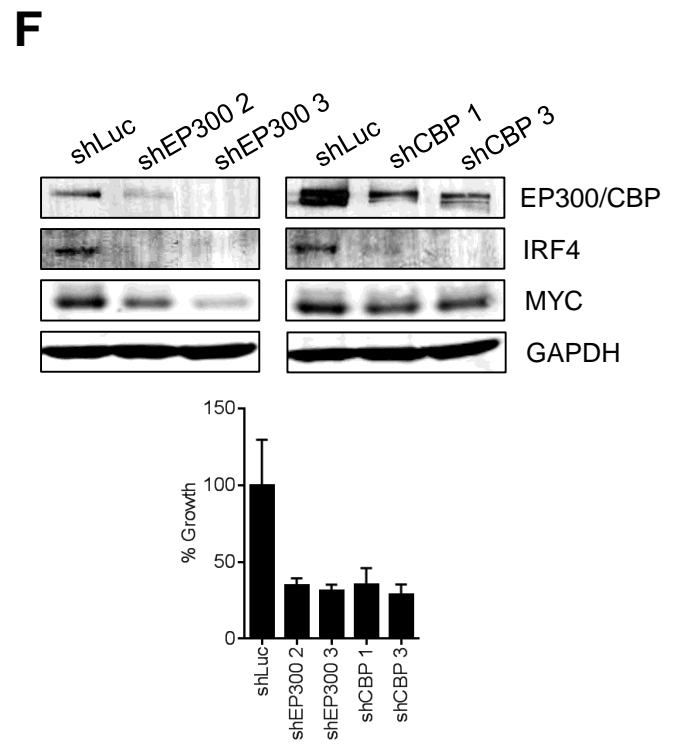

Supplement: supp [file elife_poa_e10483_Figure_5_figure_supplement_1.pdf › elife_poa_e10483_Figure_5_figure_supplement_1.pdf]

**A**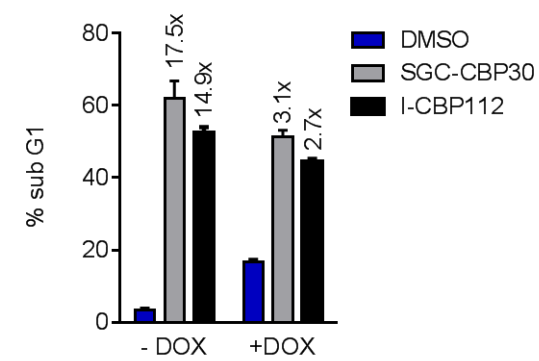**B**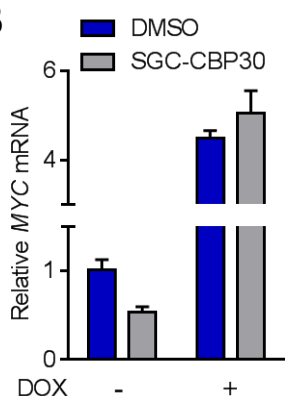**C**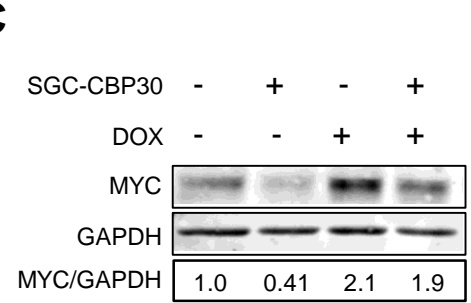**D**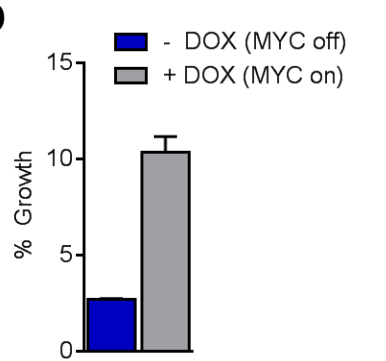**E**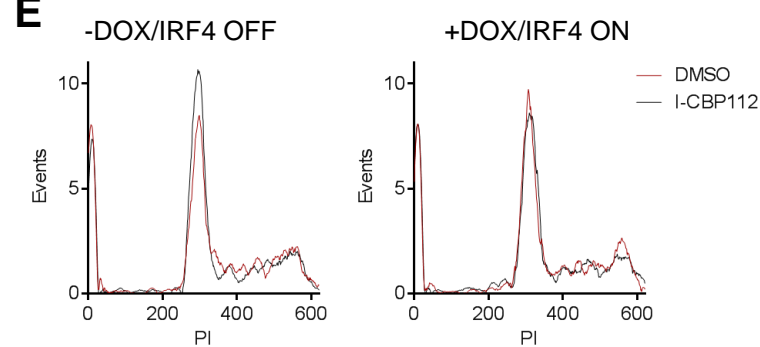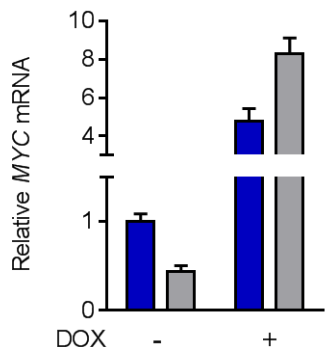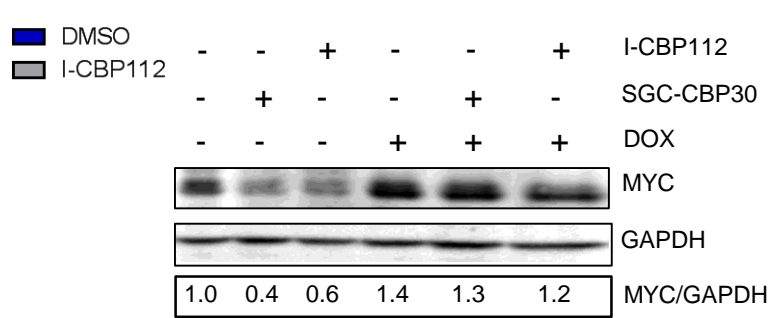**F**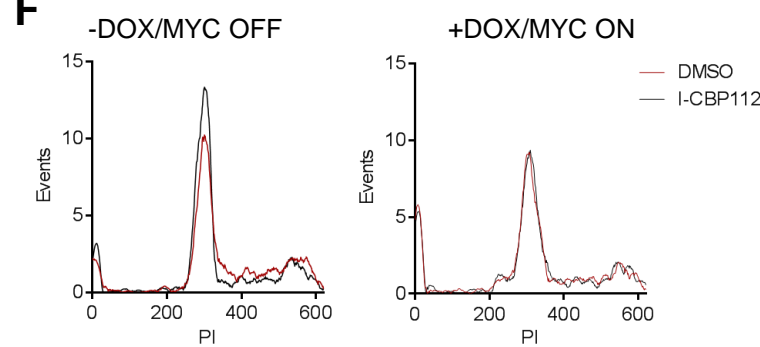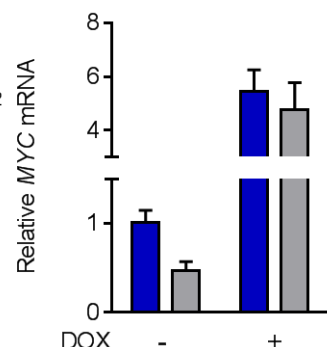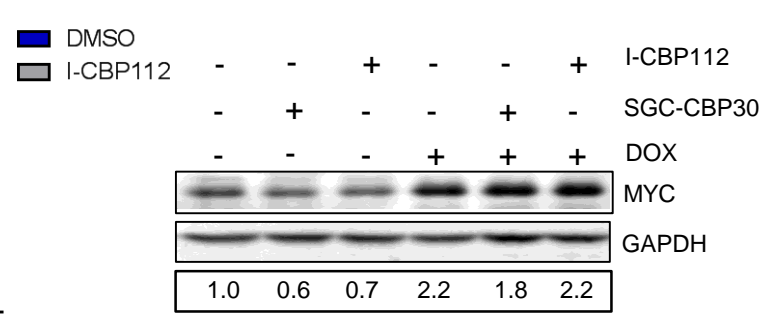

Supplement: supp [file elife_poa_e10483_Figure_6_figure_supplement_1.pdf › elife_poa_e10483_Figure_6_figure_supplement_1.pdf]
